# Supplementary material
Source: ML conference proceedings conference paper supplement (https://openaccess.thecvf.com/content/CVPR2026/html/Yang_Common_Inpainted_Objects_CVPR_2026_paper.html)
Supplement: Supplementary file 1 [file all_prompt.pdf › supplementary/static/pdfs/all_prompt.pdf]

Considering image quality is not a factor, do you think object **{inpainted\_object}** is in-context or out-of-context?

The criteria for determining whether an object is in- or out-of-context are as follows:

1. Location: The spatial location of object A is unreasonable in the context.
2. Size: The size of object A is unreasonable in the context.
3. Co-occurrence: Object A should not appear together with object B.

Please provide me the three "analysis" of the object according to all three criteria and then give me your "final decision". If the object violates one of these three criteria, this object will be considered as out-of-context. The out-of-context object doesn't need to violate these three criteria at the same time. For the co-occurrence criterion, it is considered unreasonable only if objects A and B absolutely cannot appear together. Analysis of the given object **{inpainted\_object}** only.

For example, your answer could be:

Analysis:

Location: An elephant should not be in the mid air.

Co-occurrence: It is impossible for an elephant to appear together with a microwave.

Size: The size of this elephant looks large/small/normal in this bedroom.

Final decision: Out-of-context.

Or your answer could be:

Analysis:

Location: It's normal for an elephant to appear in ...

Co-occurrence: An elephant can appear together with a ...

Size: The elephant looks normal in ...

Final decision: In-context.

Your answer is:
